# Supplementary material for: MiR-1 downregulation correlates with poor survival in clear cell renal cell carcinoma where it interferes with cell cycle regulation and metastasis
Source: PubMed Central journal article supplement (PMC4537008; doi:10.18632/oncotarget.3915), 2015-04-23
Supplement: oncotarget-06-13201-s001.pdf [file oncotarget-06-13201-s001.pdf]

## MiR-1 downregulation correlates with poor survival in clear cell renal cell carcinoma where it interferes with cell cycle regulation and metastasis

### Supplementary Material

Fig S1

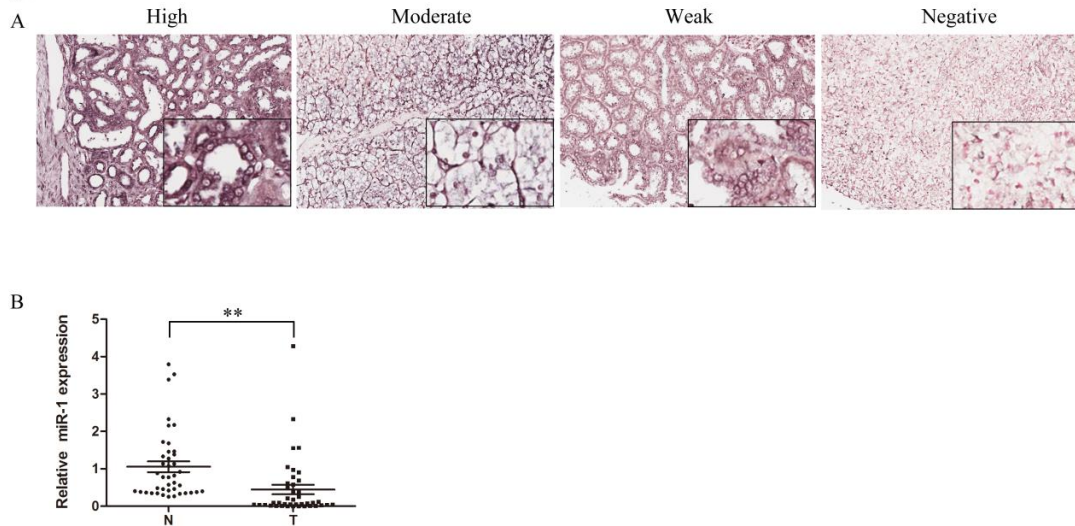

Figure S1: A. The representative images for *in situ* hybridization staining of miR-1 in different categories (negative, weak, moderate and high).

B. Relative expression of miR-1 in 41 pairs of ccRCC tumor tissues and their corresponding adjacent non-cancerous tissues ( $\Delta$ tumor- $\Delta$ normal). The average miR-1 expression was normalized by U6 expression. \*\*  $P < 0.01$

Fig. S2

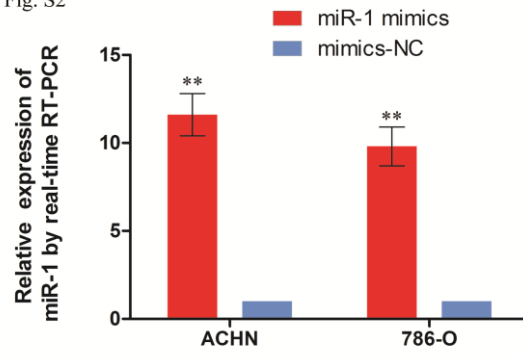

Figure S2: Real-time PCR analysis of miR-1 expression in ACHN and 786-O cells transfected with negative control or miR-1 mimics. Transcript levels were normalized by U6 expression. Error bars represent the means of three independent experiments.

\*\* ,  $P < 0.01$ .

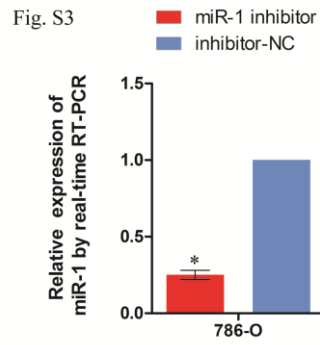

Figure S3: Real-time PCR analysis of miR-1 expression in 786-O cells transduced with negative control or miR-1 inhibitor. Transcript levels were normalized by U6 expression. Error bars represent the means of three independent experiments. \*,  $P < 0.05$ .

Fig. S4

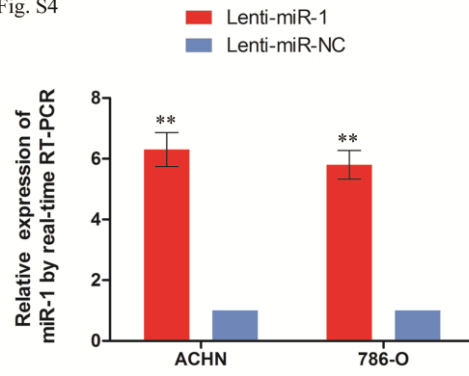

Figure S4: Real-time PCR analysis of miR-1 expression in ACHN and 786-O cells transduced with Lenti-miR-1 or Lenti-miR-NC. Transcript levels were normalized by U6 expression. Error bars represent the means of three independent experiments. \*\*,  $P < 0.01$ .

Fig. S5

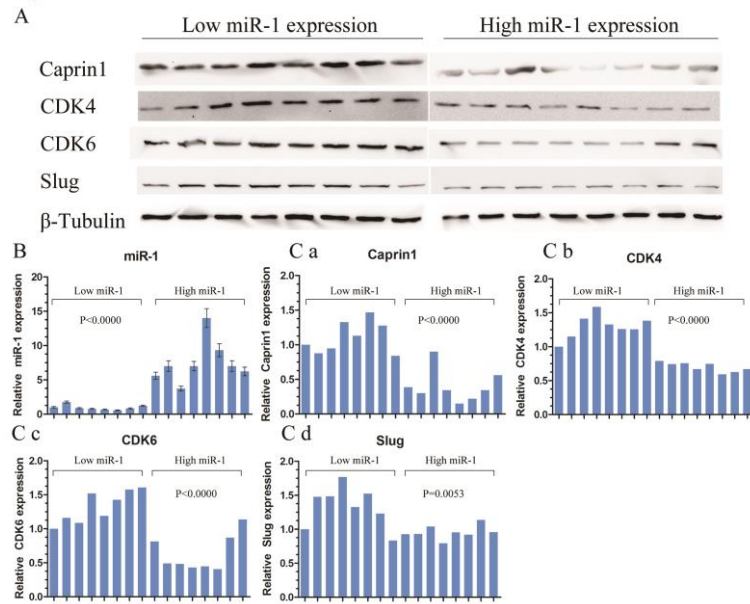

Figure S5: A. WB analysis of the protein levels of Caprin1, CDK4, CDK6, and Slug in subcutaneous transplantation tumor.  $\beta$ -Tubulin was used as a loading control.

B. miR-1 was measured by qRT-PCR in subcutaneous transplantation tumor. U6 as a control.

C. Protein levels were quantified by scanning densitometry and scored.

Fig S6

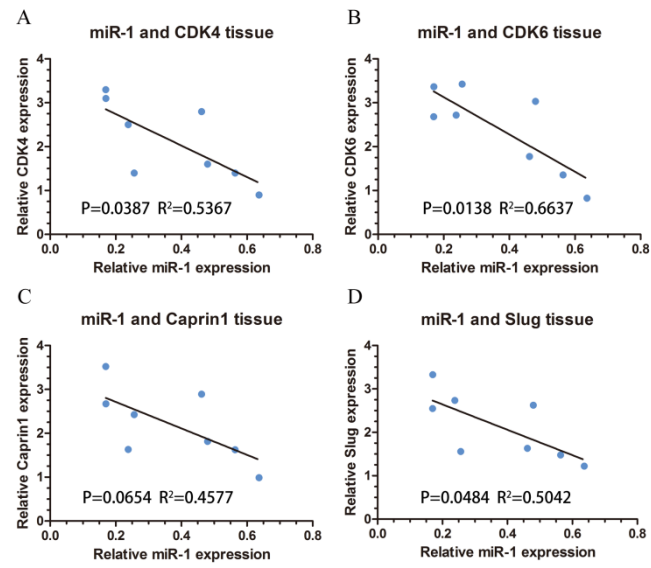

Figure S6: Correlation of miR-1 with Caprin1, CDK4, CDK6 and Slug in primary clear cell renal cell carcinoma samples.

Fig. S7

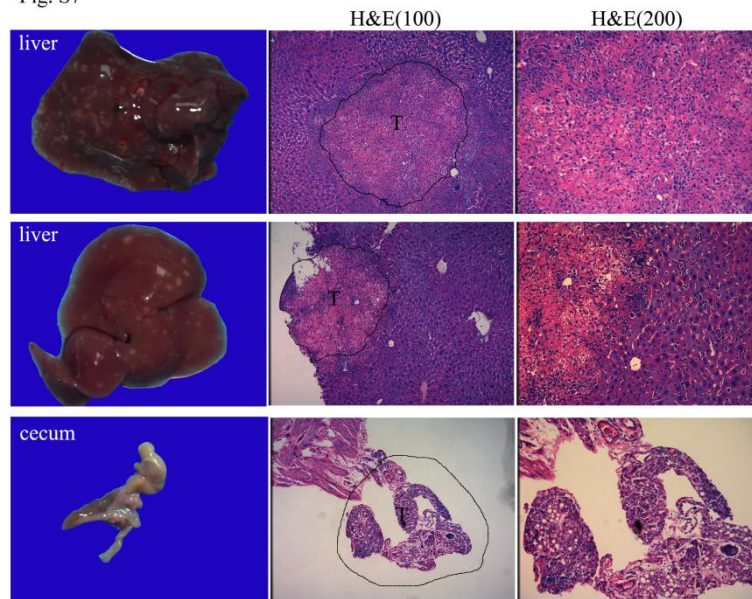

Figure S7: ACHN cells stably overexpressing Lenti-miR-NC metastasized to multiple organs and H&E dye ( $\times 100$  and  $\times 200$ ).

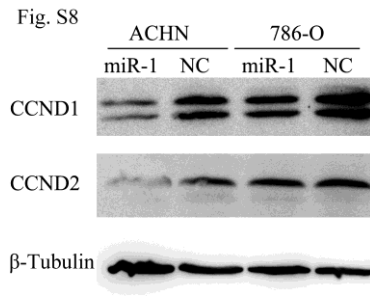

Figure S8: WB analysis of the protein levels of CCND1 and CCND2 in response to transfected with miR-1 mimics or miR-NC.



Table S1

|                  |        | No of case (%) |
|------------------|--------|----------------|
| Age(y)           | >59    | 45(50)         |
|                  | <=59   | 45(50)         |
| Gender           | Male   | 51(56.7)       |
|                  | Female | 39(43.3)       |
| Clinical Stage   | I      | 64(71.1)       |
|                  | II     | 18(20.0)       |
|                  | III    | 6(6.7)         |
|                  | IV     | 2(2.2)         |
| T classification | T1     | 65(72.2)       |
|                  | T2     | 18(20)         |
|                  | T3     | 7(7.8)         |
